# Supplementary material for: Sustainable Multi-Network Cationic Cryogels for High-Efficiency Removal of Hazardous Oxyanions from Aqueous Solutions
Source: MDPI journal article supplement (doi:10.3390/polym15040885), 2023-02-10
Supplement: s1 [file s1]

## Supplementary Materials

# Sustainable Multi-Network Cationic Cryogels for High-Efficiency Removal of Hazardous Oxyanions from Aqueous Solutions

Ecaterina Stela Dragan <sup>1,\*</sup>, Doina Humelnicu <sup>2</sup> and Maria Valentina Dinu <sup>1</sup>

<sup>1</sup> Department of Functional Polymers, "Petru Poni" Institute of Macromolecular Chemistry, Grigore Ghica Voda Alley 41 A, 700487 Iasi, Romania; vdinu@icmpp.ro

<sup>2</sup> Faculty of Chemistry, Alexandru Ioan Cuza University of Iasi, Carol I Bd. 11, 700506 Iasi, Romania; doinah@uaic.ro

\* Correspondence: sdragan@icmpp.ro; Tel.: +40-232217454; Fax: +40-232211299

**Figure S1.** FTIR spectra of SN5, DN5 and TN5.2 composites (sample codes are the same with those in Table 1).

**Figure S2.** FTIR spectra of DN20.3 and TN20.3 composite sponges (sample codes are the same with those in Table 1).

**Table S1.** Values of the average pore diameters and pore wall thicknesses of composite cryogels.

**Table S2.** Elemental analysis given by EDX spectra of SN5, SN20 and some DN and TN composite cryogels (sample codes are from Table 1).

**Table S3.** Swelling ratio (SR) and equilibrium water content (EWC) of the SN, DN and TN cryogels.

**Table S4.** Values of the compressive elastic modulus for single network cryogels as a function of number of compression cycles.

**Table S5.** Kinetic parameters for the adsorption of  $\text{Cr}_2\text{O}_7^{2-}$  anions onto multi-network composite cryogels constructed onto SN5 cryogel as the first network.

**Table S6.** Kinetic parameters for the adsorption of  $\text{Cr}_2\text{O}_7^{2-}$  anions onto SN20 and DN composite cryogels having SN20 as the first network.

**Table S7.** Kinetic parameters for the adsorption of  $\text{Cr}_2\text{O}_7^{2-}$  anions onto TN composite cryogels constructed onto SN20 cryogels.

**Table S8.** Kinetic parameters for the adsorption of  $\text{H}_2\text{PO}_4^-$  anions onto multi-network composite cryogels.

**Table S9.** Selectivity coefficients for the sorption of oxyanions in binary systems.

**Table S10.** Comparative results for the sorption of  $\text{Cr}_2\text{O}_7^{2-}$  and  $\text{H}_2\text{PO}_4^-$  anions by multi-network cryogels and by different sorbents from literature.

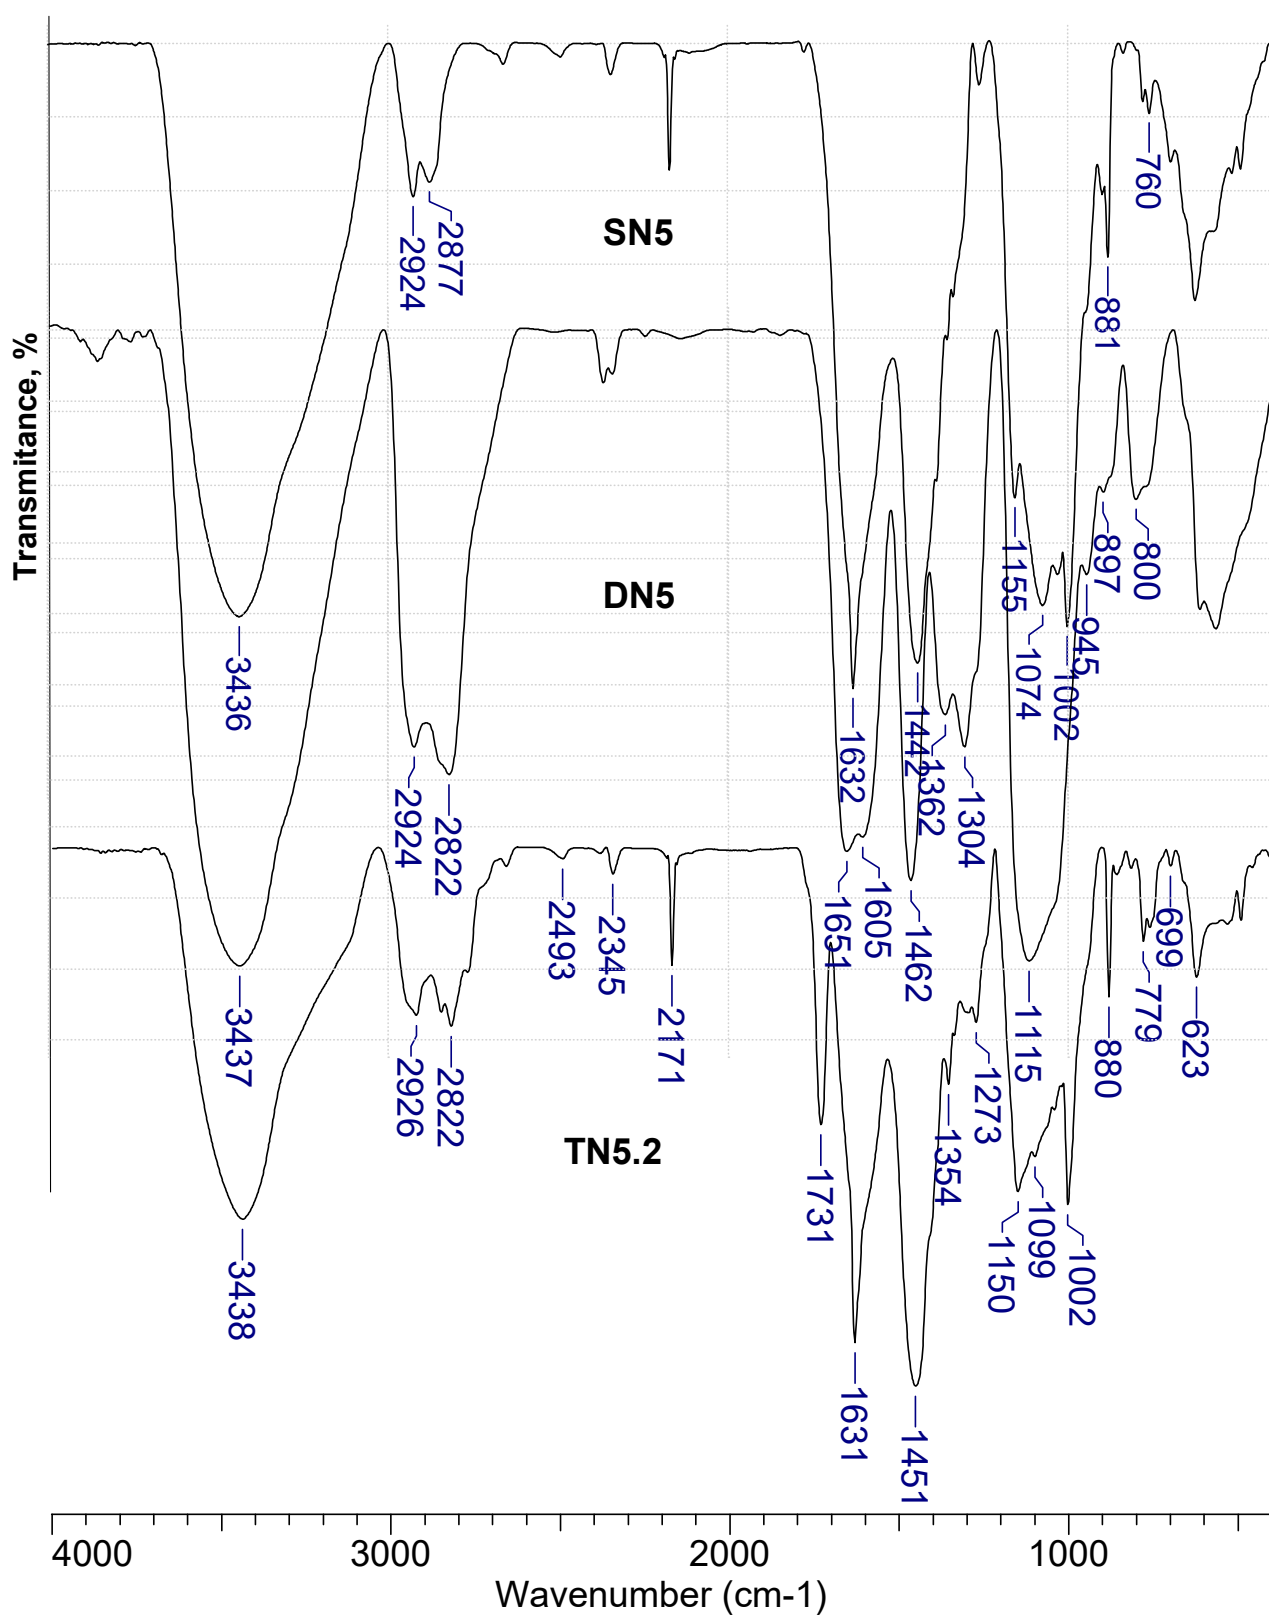

Figure S1. FTIR spectra of SN5, DN5 and TN5.2 composites (sample codes are from Table 1).

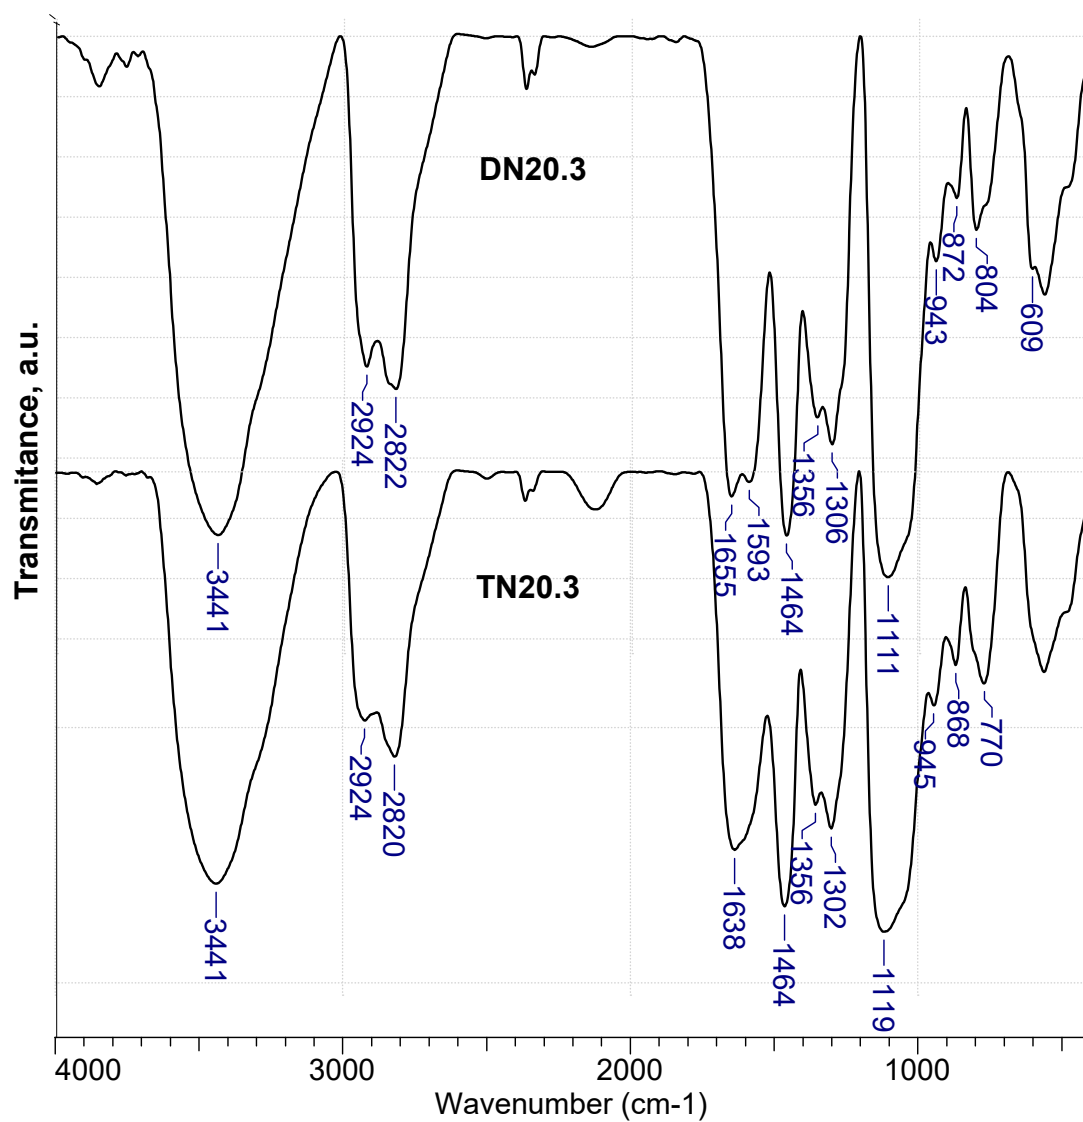

**Figure S2.** FTIR spectra of DN20.3 and TN20.3 composite sponges (sample codes are from Table 1).

**Table S1.** Values of the average pore diameters and pore wall thicknesses of composite cryogels.

| Sample | Average pore diameter, $\mu\text{m}$ | Pore wall thickness, $\mu\text{m}$ |
|--------|--------------------------------------|------------------------------------|
| SN5    | $141.81 \pm 32.56$                   | $3.50 \pm 0.83$                    |
| DN5    | $56.73 \pm 12.28$                    | $10.02 \pm 2.25$                   |
| TN5.1  | $25.53 \pm 4.27$                     | $18.64 \pm 5.21$                   |
| TN5.2  | $53.18 \pm 6.72$                     | $20.94 \pm 2.14$                   |
| SN20   | $107.83 \pm 15.47$                   | $5.73 \pm 1.46$                    |
| DN20.2 | $51.41 \pm 8.71$                     | $12.95 \pm 4.87$                   |
| TN20.2 | $35.28 \pm 5.44$                     | $20.76 \pm 3.08$                   |

|        |              |              |
|--------|--------------|--------------|
| TN20.3 | 28.08 ± 7.09 | 24.77 ± 4.37 |
|--------|--------------|--------------|

**Table S2.** Elemental analysis given by EDX spectra of SN5, SN20 and some DN and TN composite cryogels (sample codes are from Table 1).

| Sample Code | C, wt.%      | N, wt.%      | O, wt.%      |
|-------------|--------------|--------------|--------------|
| SN5         | 52.5 ± 0.15  | 9.5 ± 0.25   | 37.2 ± 0.4   |
| DN5         | 63.25        | 12.96        | 23.79        |
| TN5.1       | 47.46 ± 0.61 | 25.67 ± 2.12 | 26.87 ± 1.97 |
| TN5.2       | 67.31        | 13.35        | 17.33        |
| SN20        | 57.72 ± 3.06 | 7.77 ± 0.84  | 34.51 ± 2.29 |
| DN20.2      | 67.84 ± 0.05 | 19.14 ± 0.51 | 12.96 ± 0.46 |
| TN20.2      | 65.99 ± 0.5  | 20.45 ± 0.06 | 12.54 ± 0.55 |

**Table S3.** Swelling ratio (SR) and equilibrium water content (EWC) of the SN, DN and TN cryogels.

| Sample Code | SR    | EWC, % |
|-------------|-------|--------|
| SN5         | 64.69 | 98.45  |
| DN5         | 9.605 | 89.59  |
| TN5.1       | 9.48  | 89.33  |
| TN5.2       | 9.142 | 89.06  |
| SN20        | 45.25 | 97.79  |
| DN20.1      | 8.52  | 88.95  |
| TN20.1      | 6.745 | 85.17  |
| DN20.2      | 9.17  | 89.87  |
| TN20.2      | 8.24  | 87.98  |
| DN20.3      | 9.011 | 88.903 |
| TN20.3      | 8.151 | 87.73  |

**Table S4.** Values of the compressive elastic modulus for single network cryogels as a function of number of compression cycles.

| Sample code | Number of compression cycle | Compressive elastic modulus, kPa | R <sup>2</sup> |
|-------------|-----------------------------|----------------------------------|----------------|
| SN5         | 1                           | 7.74                             | 0.999          |
|             | 2                           | 4.52                             | 0.998          |
|             | 3                           | 4.14                             | 0.998          |
|             | 4                           | 4.17                             | 0.998          |
|             | 5                           | 3.48                             | 0.998          |
| SN20        | 1                           | 3.54                             | 0.998          |
|             | 2                           | 3.52                             | 0.997          |
|             | 3                           | 3.22                             | 0.999          |
|             | 4                           | 2.66                             | 0.984          |
|             | 5                           | 2.04                             | 0.999          |

**Table S5.** Kinetic parameters for the adsorption of Cr<sub>2</sub>O<sub>7</sub><sup>2-</sup> anions onto multi-network composite cryogels constructed onto SN5 cryogel as the first network.

| Kinetic model | Parameters                                      | SN5                      | DN5                      | TN5.1                    | TN5.2                    |
|---------------|-------------------------------------------------|--------------------------|--------------------------|--------------------------|--------------------------|
| PFO           | $q_e^{exp}$ , mg/g                              | 102.19                   | 121.38                   | 133.28                   | 133.33                   |
|               | $q_e^{calc}$ , mg/g                             | 99.63                    | 118.56                   | 129.4                    | 130.99                   |
|               | $k_1$ , min <sup>-1</sup>                       | 0.0331                   | 0.0283                   | 0.0436                   | 0.05767                  |
|               | R <sup>2</sup>                                  | 0.9614                   | 0.9553                   | 0.9591                   | 0.9791                   |
|               | $\chi^2$                                        | 35                       | 58                       | 59                       | 30                       |
| PSO           | $q_e^{calc}$ , mg/g                             | 105.83                   | 126.3                    | 136.6                    | 136.6                    |
|               | $k_2$ , g mg <sup>-1</sup> min <sup>-1</sup>    | 5.213 x 10 <sup>-4</sup> | 3.732 x 10 <sup>-4</sup> | 5.396 x 10 <sup>-4</sup> | 7.864 x 10 <sup>-4</sup> |
|               | R <sup>2</sup>                                  | 0.9909                   | 0.9866                   | 0.9927                   | 0.9954                   |
|               | $\chi^2$                                        | 8                        | 17                       | 11                       | 6.5                      |
| Elovich       | $\alpha$ , mg g <sup>-1</sup> min <sup>-1</sup> | 150.5                    | 85.75                    | 808                      | 15076                    |
|               | $\beta$ , g mg <sup>-1</sup>                    | 0.086                    | 0.0668                   | 0.0777                   | 0.1009                   |
|               | R <sup>2</sup>                                  | 0.945                    | 0.9427                   | 0.9562                   | 0.9552                   |
|               | $\chi^2$                                        | 50                       | 75                       | 64                       | 63                       |

**Table S6.** Kinetic parameters for the adsorption of Cr<sub>2</sub>O<sub>7</sub><sup>2-</sup> anions onto SN20 and DN composite cryogels having SN20 as the first network.

| Kinetic model | Parameters                | SN20   | DN20.1 | DN20.2 | DN20.3 |
|---------------|---------------------------|--------|--------|--------|--------|
|               | $q_e^{exp}$ , mg/g        | 93.41  | 109.34 | 127.59 | 123.76 |
|               | $q_e^{calc}$ , mg/g       | 91.37  | 106.68 | 124.2  | 120.98 |
|               | $k_1$ , min <sup>-1</sup> | 0.0271 | 0.033  | 0.032  | 0.0295 |

|         |                                             |                        |                        |                        |                        |
|---------|---------------------------------------------|------------------------|------------------------|------------------------|------------------------|
| PFO     | $R^2$                                       | 0.9598                 | 0.9566                 | 0.953                  | 0.9566                 |
|         | $\chi^2$                                    | 32                     | 45                     | 66                     | 59                     |
| PSO     | $q_e \text{ calc, mg/g}$                    | 97.47                  | 113.2                  | 132                    | 128.72                 |
|         | $k_2, \text{g mg}^{-1} \text{ min}^{-1}$    | $4.594 \times 10^{-4}$ | $4.904 \times 10^{-4}$ | $4.047 \times 10^{-4}$ | $3.835 \times 10^{-4}$ |
|         | $R^2$                                       | 0.9877                 | 0.9881                 | 0.9878                 | 0.9864                 |
|         | $\chi^2$                                    | 9.6                    | 12                     | 17                     | 18                     |
|         | $\alpha, \text{mg g}^{-1} \text{ min}^{-1}$ | 61.15                  | 168                    | 163.1                  | 2542                   |
| Elovich | $\beta, \text{g mg}^{-1}$                   | 0.0845                 | 0.0808                 | 0.0678                 | 0.0972                 |
|         | $R^2$                                       | 0.9411                 | 0.9444                 | 0.9474                 | 0.9111                 |
|         | $\chi^2$                                    | 46                     | 57                     | 74                     | 23                     |

**Table S7.** Kinetic parameters for the adsorption of  $\text{Cr}_2\text{O}_7^{2-}$  anions onto TN composite cryogels constructed onto SN20 cryogels.

| Kinetic model | Parameters                                  | TN20.1                  | TN20.2                 | TN20.3                 |
|---------------|---------------------------------------------|-------------------------|------------------------|------------------------|
|               | $q_e \text{ exp, mg/g}$                     | 131.75                  | 132.8                  | 133.3                  |
| PFO           | $q_e \text{ calc, mg/g}$                    | 128.3                   | 128.8                  | 130.3                  |
|               | $k_1, \text{min}^{-1}$                      | 0.02576                 | 0.0382                 | 0.0479                 |
|               | $R^2$                                       | 0.9576                  | 0.9579                 | 0.9708                 |
|               | $\chi^2$                                    | 66                      | 64                     | 42                     |
|               | $q_e \text{ calc, mg/g}$                    | 137.2                   | 137.2                  | 136.91                 |
| PSO           | $k_2, \text{g mg}^{-1} \text{ min}^{-1}$    | $3.0605 \times 10^{-4}$ | $3.791 \times 10^{-4}$ | $6.104 \times 10^{-4}$ |
|               | $R^2$                                       | 0.9891                  | 0.9917                 | 0.9947                 |
|               | $\chi^2$                                    | 17                      | 13                     | 8                      |
|               | $\alpha, \text{mg g}^{-1} \text{ min}^{-1}$ | 67.64                   | 147.67                 | 194.3                  |
| Elovich       | $\beta, \text{g mg}^{-1}$                   | 0.0581                  | 0.0641                 | 0.0845                 |
|               | $R^2$                                       | 0.9477                  | 0.9513                 | 0.9519                 |
|               | $\chi^2$                                    | 82                      | 74                     | 69                     |

**Table S8.** Kinetic parameters for the adsorption of  $\text{H}_2\text{PO}_4^-$  anions onto multi-network composite cryogels.

| Kinetic model | Parameters               | DN20.1 | DN20.2 | TN20.1 | TN20.2 | TN5.1  |
|---------------|--------------------------|--------|--------|--------|--------|--------|
|               | $q_e \text{ exp, mg/g}$  | 103.27 | 127.01 | 128.64 | 123.63 | 128.55 |
|               | $q_e \text{ calc, mg/g}$ | 100.49 | 123.88 | 126.76 | 121.86 | 125.97 |
|               | $k_1, \text{min}^{-1}$   | 0.0318 | 0.0361 | 0.0212 | 0.0221 | 0.0292 |

|         |                                                 |                          |                          |                          |                           |                          |
|---------|-------------------------------------------------|--------------------------|--------------------------|--------------------------|---------------------------|--------------------------|
| PFO     | $R^2$                                           | 0.9506                   | 0.9661                   | 0.9757                   | 0.9683                    | 0.9663                   |
|         | $\chi^2$                                        | 46                       | 47                       | 39                       | 46                        | 50                       |
| PSO     | $q_e$ calc, mg/g                                | 106.8                    | 131.32                   | 136.4                    | 131.04                    | 134.1                    |
|         | $k_2$ , g mg <sup>-1</sup> min <sup>-1</sup>    | 4.981 x 10 <sup>-4</sup> | 4.596 x 10 <sup>-4</sup> | 2.454 x 10 <sup>-4</sup> | 2.6803 x 10 <sup>-4</sup> | 3.618 x 10 <sup>-4</sup> |
|         | $R^2$                                           | 0.9865                   | 0.9932                   | 0.9882                   | 0.9914                    | 0.9885                   |
|         | $\chi^2$                                        | 12                       | 9                        | 19                       | 12                        | 17                       |
| Elovich | $\alpha$ , mg g <sup>-1</sup> min <sup>-1</sup> | 129.45                   | 282                      | 33.3                     | 36.42                     | 114.7                    |
|         | $\beta$ , g mg <sup>-1</sup>                    | 0.0836                   | 0.0727                   | 0.0531                   | 0.0563                    | 0.0639                   |
|         | $R^2$                                           | 0.9471                   | 0.9454                   | 0.9314                   | 0.9437                    | 0.9357                   |
|         | $\chi^2$                                        | 49                       | 75                       | 110                      | 83                        | 95                       |

**Table S9.** Selectivity coefficients for the sorption of oxyanions in binary systems.

| Sample Code<br>(see Table 1) | Cr <sub>2</sub> O <sub>7</sub> <sup>2-</sup> |                       |                     | H <sub>2</sub> PO <sub>4</sub> <sup>-</sup> |                       |                  | $k_{H_2PO_4^-}^{Cr_2O_7^{2-}}$ |
|------------------------------|----------------------------------------------|-----------------------|---------------------|---------------------------------------------|-----------------------|------------------|--------------------------------|
|                              | C <sub>e</sub> , mg/L                        | q <sub>e</sub> , mg/g | $K_{dCr_2O_7^{2-}}$ | C <sub>e</sub> , mg/L                       | q <sub>e</sub> , mg/g | $K_{dH_2PO_4^-}$ |                                |
| SN5                          | 26.85                                        | 97.53                 | 3.63                | 30.54                                       | 92.61                 | 3.03             | 1.19                           |
| TN5.2                        | 2.14                                         | 130.48                | 60.97               | 5.72                                        | 125.71                | 21.98            | 2.77                           |
| SN20                         | 32.18                                        | 90.42                 | 2.81                | 35.09                                       | 86.54                 | 2.47             | 1.14                           |
| DN20.1                       | 21.54                                        | 1044.61               | 4.86                | 28.47                                       | 95.38                 | 3.35             | 1.45                           |
| DN20.2                       | 8.69                                         | 121.74                | 14.01               | 10.41                                       | 119.46                | 11.48            | 1.28                           |
| TN20.3                       | 2.97                                         | 129.37                | 43.56               | 7.14                                        | 123.82                | 17.34            | 2.51                           |

$$k_{H_2PO_4^-}^{Cr_2O_7^{2-}} = \frac{K_{dCr_2O_7^{2-}}}{K_{dH_2PO_4^-}}$$

**Table S10.** Comparative results for the sorption of Cr<sub>2</sub>O<sub>7</sub><sup>2-</sup> and H<sub>2</sub>PO<sub>4</sub><sup>-</sup> anions by multi-network cryogels and by different sorbents from literature.

| Sorbent                                                     |  |  |  | Ion                                          | pH  | Temp., ° | Sorbent   | q <sub>m</sub> ,<br>mg/g | Ref.* |
|-------------------------------------------------------------|--|--|--|----------------------------------------------|-----|----------|-----------|--------------------------|-------|
|                                                             |  |  |  |                                              |     | C        | dose, g/L |                          |       |
| Weak base anion exchange resin                              |  |  |  | Cr <sub>2</sub> O <sub>7</sub> <sup>2-</sup> | 4   | 25       | 0.6       | 194                      | [10]  |
| impregnated with EPIDMA                                     |  |  |  |                                              |     |          |           |                          |       |
| 3D-Ordered Macroporous Cross-Linked PS-g-PDMAEMA            |  |  |  | Cr <sub>2</sub> O <sub>7</sub> <sup>2-</sup> | 4   | 25       | 0.4       | 400                      | [12]  |
| Amidoxime sorbent                                           |  |  |  | Cr <sub>2</sub> O <sub>7</sub> <sup>2-</sup> | 5   | 25       | ~ 0.444   | 130.65                   | [13]  |
| Strong base anion exchanger embedded into CS/PVAm cryobeads |  |  |  | Cr <sub>2</sub> O <sub>7</sub> <sup>2-</sup> | 5.5 | 25       | 1.25      | 318                      | [14]  |
| Magnetite modified chitosan                                 |  |  |  | Cr <sub>2</sub> O <sub>7</sub> <sup>2-</sup> | 3   | 25       | 3         | 58.14                    | [16]  |

|                                                                             |                                              |     |        |       |         |           |  |
|-----------------------------------------------------------------------------|----------------------------------------------|-----|--------|-------|---------|-----------|--|
| cinnamaldehyde                                                              |                                              |     |        |       |         |           |  |
| TN5.2(CS/PEI18/PDMAEMA)                                                     | Cr <sub>2</sub> O <sub>7</sub> <sup>2-</sup> | 4   | 25     | 0.75  | 439     | This work |  |
| Zirconium molybdate and macroporous anion exchange resin (ZMAE)             | H <sub>2</sub> PO <sub>4</sub> <sup>-</sup>  | 5.5 | 25     | 0.5   | 26.1**  | [19]      |  |
| Quaternary ammonium salt of cotton linter                                   | H <sub>2</sub> PO <sub>4</sub> <sup>-</sup>  | 7   | 30     | ~ 6.7 | 30.13   | [21]      |  |
| Zr-loaded magnetic CS/PVA IPN hydrogel                                      | H <sub>2</sub> PO <sub>4</sub> <sup>-</sup>  | 6.5 | 22 ± 1 | 0.25  | 50.76** | [22]      |  |
| Zr(IV)-crosslinked carboxymethyl cellulose/carboxymethyl chitosan hydrogels | H <sub>2</sub> PO <sub>4</sub> <sup>-</sup>  | 2   | 25     | n.p.  | 93.5    | [23]      |  |
| TN20.2(CS/PEI25/PEI18)                                                      | H <sub>2</sub> PO <sub>4</sub> <sup>-</sup>  | 4   | 23     | 0.75  | 391.1   | This work |  |
| TN5.2(CS/ PEI18/PDMAEMA)                                                    | H <sub>2</sub> PO <sub>4</sub> <sup>-</sup>  | 4   | 23     | 0.75  | 422.45  | This work |  |

\*The number of references is identical with that given in the main text. \*\*mg-P/g sorbent.
